# Supplementary material for: Electroacupuncture at Acupoints Reverses Plasma Glutamate, Lipid, and LDL/VLDL in an Acute Migraine Rat Model: A 1H NMR‐Based Metabolomic Study
Source: Hindawi journal article supplement (doi:10.1155/2014/659268), 2014-01-01

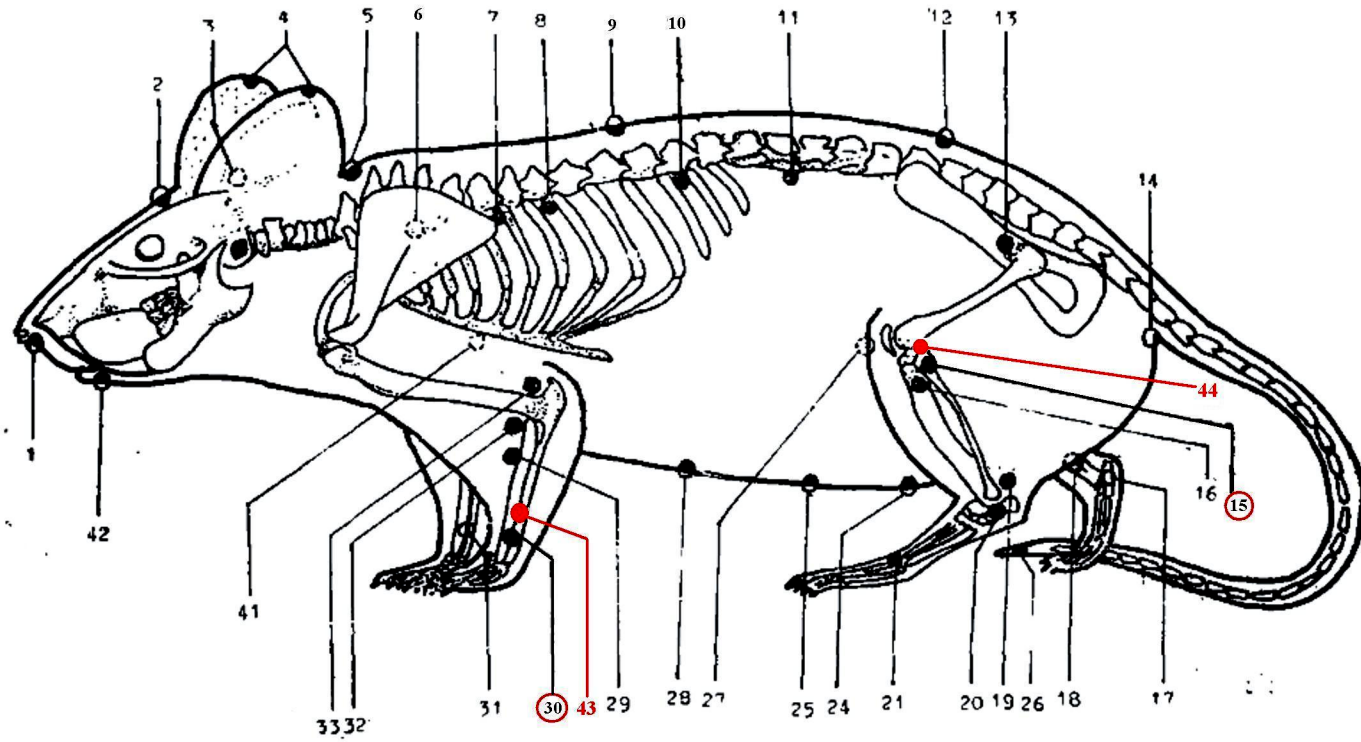

Supplement: f1 [file 659268.f1.pdf]
